# Supplementary material
Source: PubMed Central journal article supplement (PMC4317052)
Supplement: jp411901m_si_001.pdf [file jp411901m_si_001.pdf]

## 2D IR Spectroscopy of Histidine: Probing Sidechain Structure and Dynamics via Backbone Amide I Vibration

*Ayanjeet Ghosh, Matthew J. Tucker, and Feng Gai\**

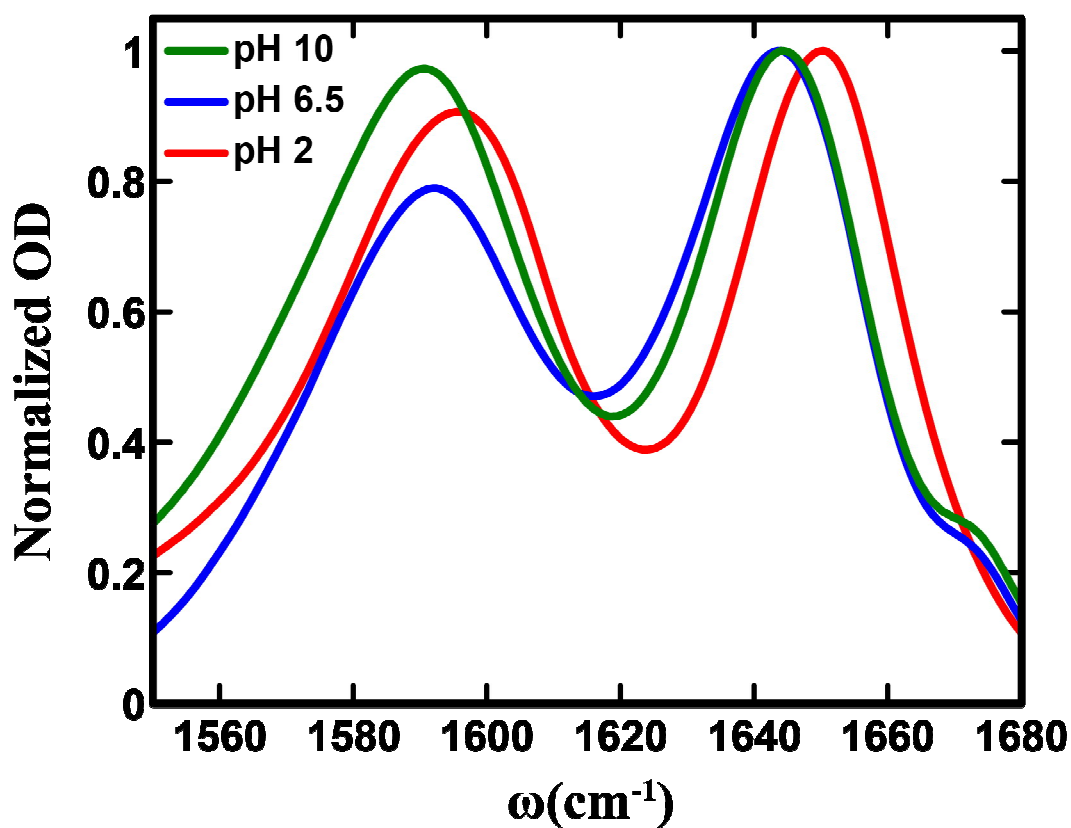

**Figure S1.** Linear IR spectra of the histidine dipeptide obtained at different pH values, as indicated.

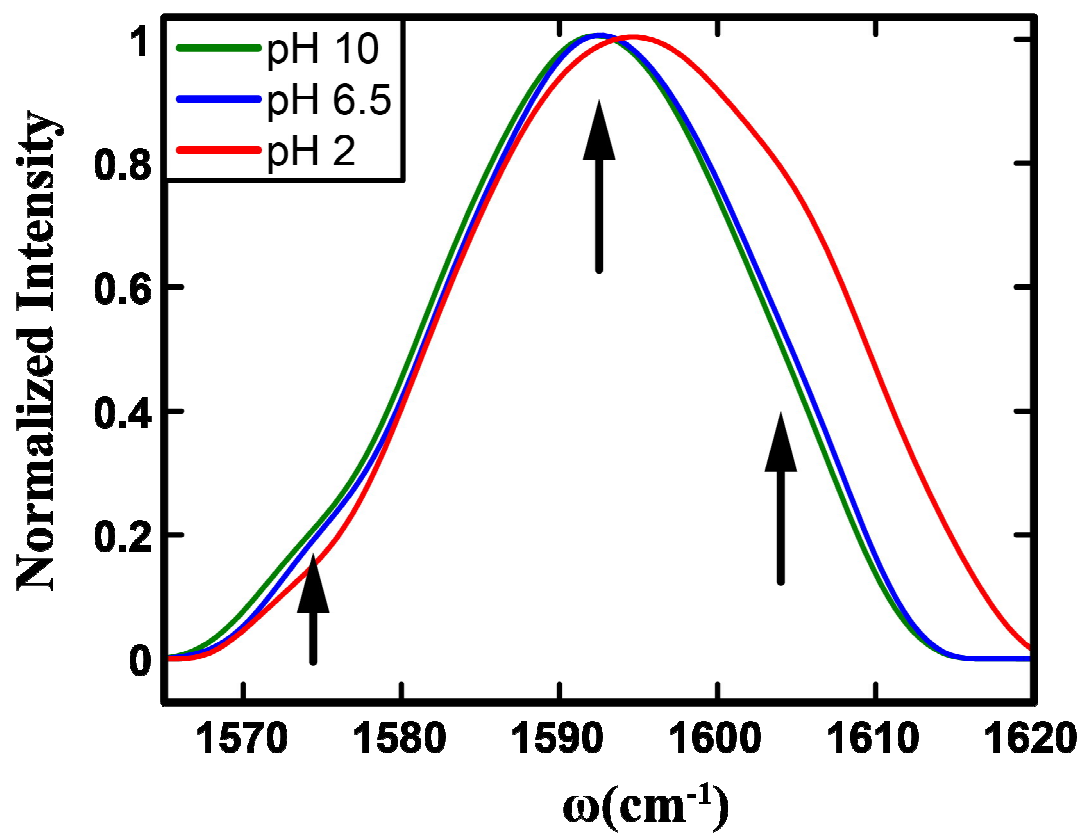

**Figure S2.** Diagonal traces of the  $^{13}\text{C}=\text{O}$  labeled N-terminal amide obtained from 2D IR spectra at  $T = 0$  and different pH values, as indicated. The diagonal traces were obtained by taking a slice of the corresponding 2D spectrum parallel to the diagonal line that runs through the peak maxima.
